# Supplementary material for: Selective conversion of bio-derived ethanol to renewable BTX over Ga-ZSM-5
Source: Royal Society of Chemistry journal article supplement (doi:10.1039/c7gc01188a), 2017-01-01
Supplement: c7gc01188a1.pdf [file c7gc01188a1.pdf]

## Supplementary Materials

### Selective Conversion of Bio-Derived Ethanol to Renewable BTX over Ga-ZSM-5

Zhenglong Li,<sup>a</sup> Andrew W. Lepore,<sup>b,c</sup> Mariam F. Salazar,<sup>b,1</sup> Guo Shiou Foo,<sup>d</sup>  
Brian H. Davison,<sup>e</sup> Zili Wu,<sup>d,f</sup> Chaitanya K. Narula\*<sup>b,c</sup>

<sup>a</sup> Energy & Transportation Science Division, Oak Ridge National Laboratory,  
Oak Ridge, TN 37831, USA

<sup>b</sup> Materials Science & Technology Division, Oak Ridge National Laboratory

<sup>c</sup> Bredeesen Center for Interdisciplinary Research, 821 Volunteer Blvd., The University of  
Tennessee, Knoxville, TN 37996, USA

<sup>d</sup> Chemical Sciences Division, Oak Ridge National Laboratory

<sup>e</sup> BioSciences Division, Oak Ridge National Laboratory

<sup>f</sup> The Center for Nanophase Materials Sciences, Oak Ridge National Laboratory

Manuscript for submission to:  
Green Chemistry

\*Corresponding author: Chaitanya K. Narula

E-mail address: [narulack@ornl.gov](mailto:narulack@ornl.gov)

---

<sup>1</sup> Current address: Technip Stone & Webster Process Technology, Inc., 56 Woodrock Rd., Weymouth, MA 02189

*This manuscript has been authored by UT-Battelle, LLC under Contract No. DE-AC05-00OR22725 with the U.S. Department of Energy. The United States Government retains and the publisher, by accepting the article for publication, acknowledges that the United States Government retains a non-exclusive, paid-up, irrevocable, world-wide license to publish or reproduce the published form of this manuscript, or allow others to do so, for United States Government purposes. The Department of Energy will provide public access to these results of federally sponsored research in accordance with the DOE Public Access Plan (<http://energy.gov/downloads/doe-public-access-plan>).*

Table S1. Unit cell parameters obtained from the Rietveld refinements and calculated cell volumes for the ZSM-5 phase.

| Sample                                                        | a (Å) | b (Å) | c (Å) | Volume (Å <sup>3</sup> ) |
|---------------------------------------------------------------|-------|-------|-------|--------------------------|
| H-ZSM-5                                                       | 20.14 | 19.95 | 13.42 | 5392                     |
| 6.2% Ga-ZSM-5                                                 | 20.14 | 19.94 | 13.42 | 5389                     |
| 1.7% Ga-ZSM-5                                                 | 20.13 | 19.93 | 13.41 | 5378                     |
| Physical mixture 5.9% Ga <sub>2</sub> O <sub>3</sub> /H-ZSM-5 | 20.14 | 19.94 | 13.42 | 5388                     |

Table S2. Surface species atomic ratio based on the XPS analysis

|                                         | Si/Al | Ga/Si |
|-----------------------------------------|-------|-------|
| 4.4% Ga-ZSM-5 with uniform distribution | 11.5  | 0.05  |
| 4.4% Ga-ZSM-5                           | 13.8  | 0.11  |

Table S3. Liquid (C<sub>5+</sub>) hydrocarbon distributions for various catalysts at 450 °C and 1.6 h<sup>-1</sup>

|                                                                                  | C <sub>5+</sub> product distribution, wt% |         |           |      |         | C <sub>5+</sub> yield |
|----------------------------------------------------------------------------------|-------------------------------------------|---------|-----------|------|---------|-----------------------|
|                                                                                  | Paraffins                                 | Olefins | Aromatics | BTX  | Benzene |                       |
| H-ZSM-5                                                                          | 6.6                                       | 10.6    | 82.8      | 80.3 | 14.1    | 25.5                  |
| Physical mixture Ga <sub>2</sub> O <sub>3</sub> /H-ZSM-5 (5.9%) before reduction | 6.9                                       | 14.0    | 79.1      | 74.1 | 12.0    | 26.4                  |
| Physical mixture Ga <sub>2</sub> O <sub>3</sub> /H-ZSM-5 (15%) before reduction  | 7.2                                       | 9.6     | 83.2      | 79.0 | 13.1    | 24.7                  |
| Physical mixture Ga <sub>2</sub> O <sub>3</sub> /H-ZSM-5 (50%) before reduction  | 9.6                                       | 9.3     | 81.1      | 77.0 | 12.8    | 24.2                  |
| Physical mixture Ga <sub>2</sub> O <sub>3</sub> /H-ZSM-5 (5.9%) after reduction  | 0.6                                       | 0.7     | 99        | 94   | 22.9    | 52                    |
| 4.4% Ga-ZSM-5 ion exchange                                                       | 0.9                                       | 2.0     | 97        | 88   | 23.6    | 52                    |
| Physical mixture Ga <sub>2</sub> O <sub>3</sub> /H-ZSM-5 (15%) after reduction   | 1.6                                       | 2.2     | 96        | 90   | 20.9    | 47                    |
| Physical mixture Ga <sub>2</sub> O <sub>3</sub> /H-ZSM-5 (50%) before reduction  | 1.7                                       | 2.5     | 96        | 88   | 20      | 44                    |

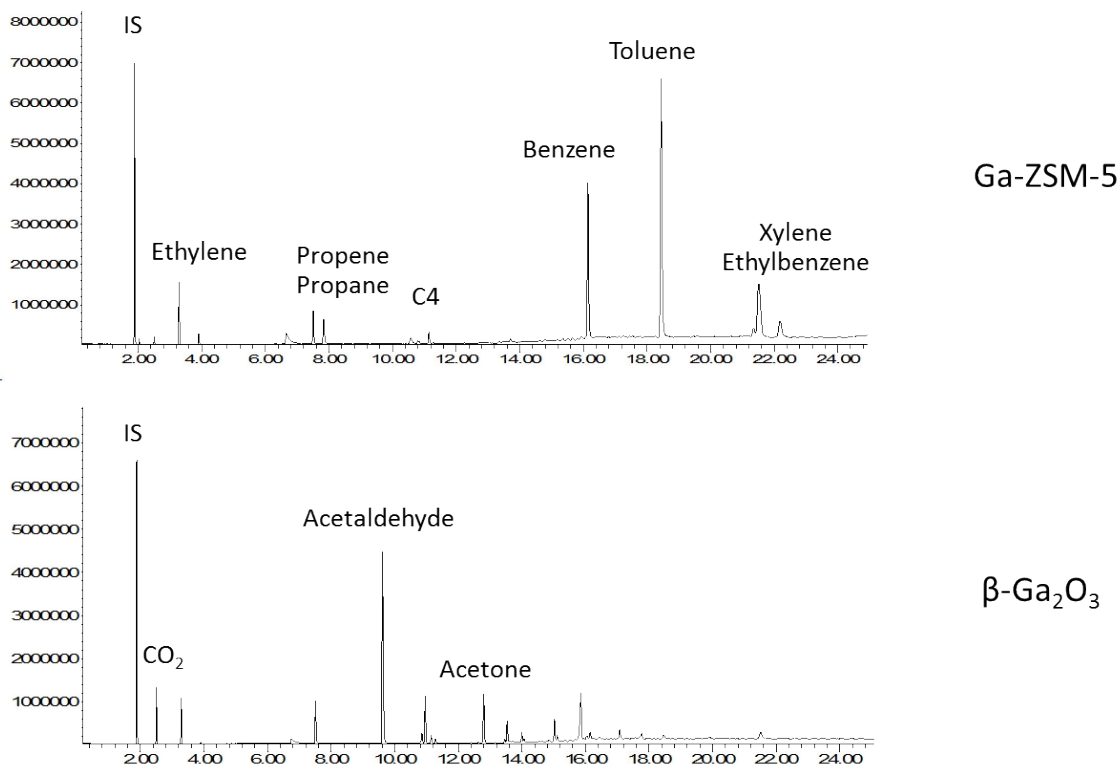

Fig. S1. GC chromatography comparison between Ga-ZSM-5 and  $\beta$ -Ga<sub>2</sub>O<sub>3</sub>. IS: internal standard nitrogen

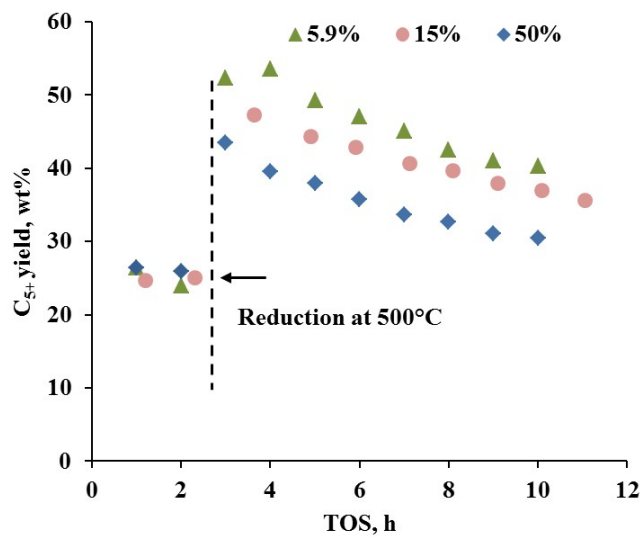

Fig. S2. C<sub>5+</sub> yield for physical mixtures of Ga<sub>2</sub>O<sub>3</sub>/H-ZSM-5 with different Ga loadings before and after hydrogen reduction pretreatment at 500 °C. Reaction condition: 450 °C and 1.6 h<sup>-1</sup>.

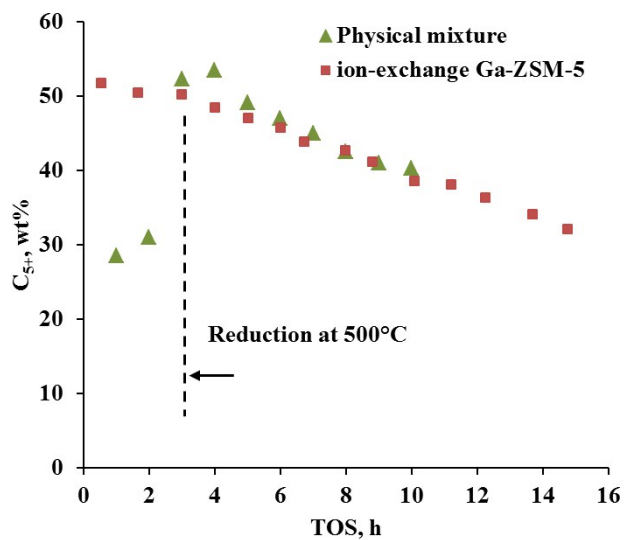

Fig. S3. Liquid ( $C_{5+}$ ) hydrocarbon yield for ion-exchange 4.4% Ga-ZSM-5 and physical mixture 5.9%  $Ga_2O_3/H-ZSM-5$  (Ga loading: 4.4%) before and after hydrogen reduction at 500 °C, the ethanol reaction is performed at 450 °C and 1.6 h<sup>-1</sup>.

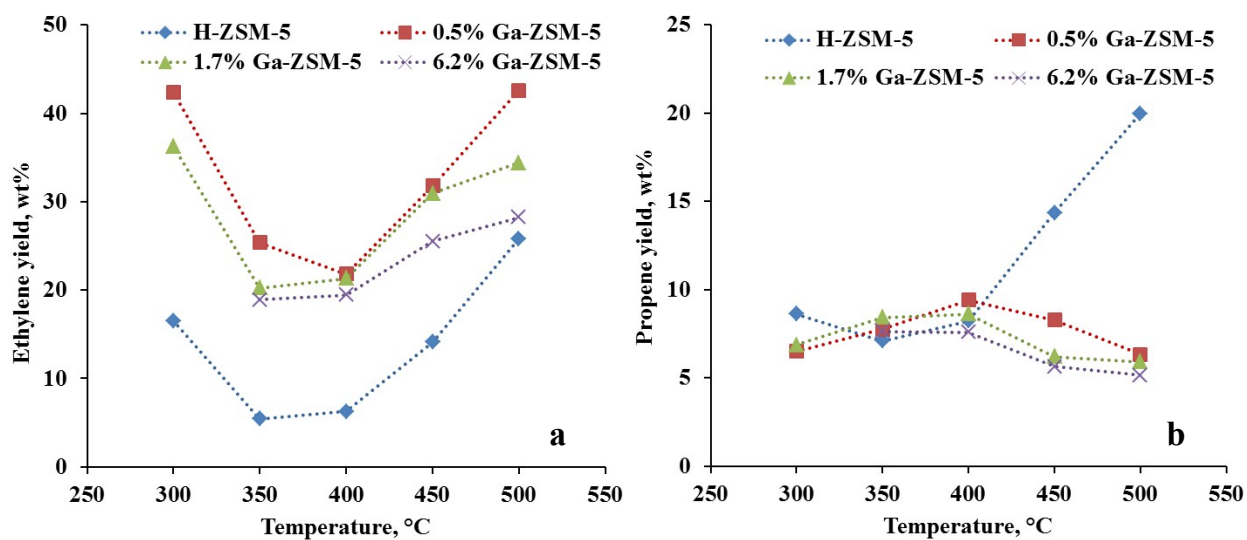

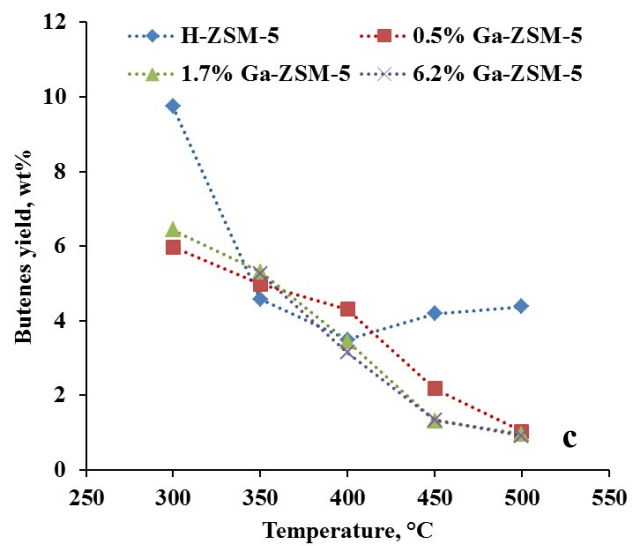

Fig. S4. (a) Ethylene, (b) propene and (c) butenes yield vs temperature for H-ZSM-5 and Ga-ZSM-5 with different Ga loadings
